# Supplementary material
Source: PubMed Central journal article supplement (PMC3099723)
Supplement: supp_M111.240598_jbc.M111.240598-2.pdf [file supp_M111.240598_jbc.M111.240598-2.pdf]

Figure S2 (Back et al.)

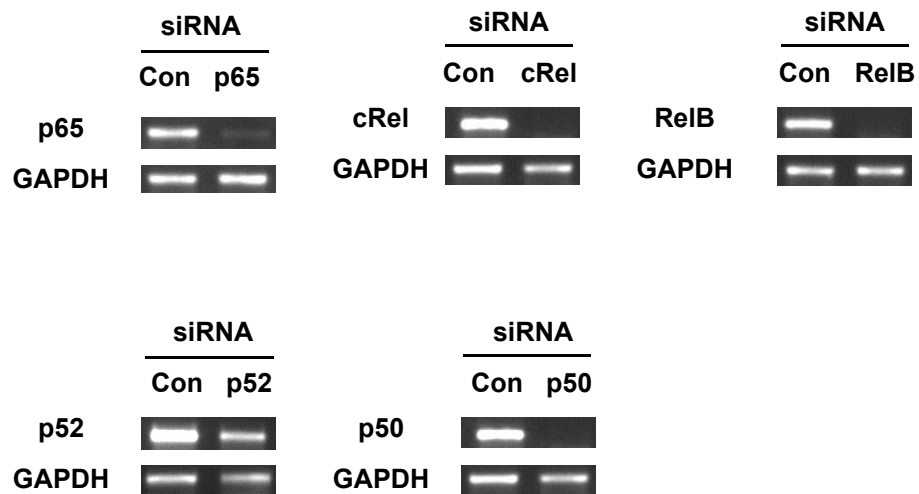

**Figure S2:** siRNA-mediated knockdown of NF- $\kappa$ B subunits in A431 cells. The levels of p65Rel, cRel, RelB, p52, p53, and GAPDH were confirmed by RT-PCR. The human siRNAs for NF- $\kappa$ B subunits were purchased from Santa Cruz Biotechnology. On the day before transfection,  $5 \times 10^5$  A431 cells were plated in 100 mm petri plates and grown in 10 ml of DMEM supplemented with 10% fetal bovine serum. After 24 h in culture, 50  $\mu$ l of 10  $\mu$ M stock solution of siRNA duplexes were transfected into cells with a Lipofectamine<sup>TM</sup> RNAiMAX transfection reagent according to the manufacturer's protocol (Invitrogen, Carlsbad, CA). Following 24-36 h of incubation, the cells were harvested and the levels of NF- $\kappa$ B subunits were determined by RT-PCR. GAPDH, internal control.
