# Supplementary material
Source: PubMed Central journal article supplement (PMC3099723)
Supplement: supp_M111.240598_jbc.M111.240598-3.pdf [file supp_M111.240598_jbc.M111.240598-3.pdf]

Figure S3 (Back et al.)

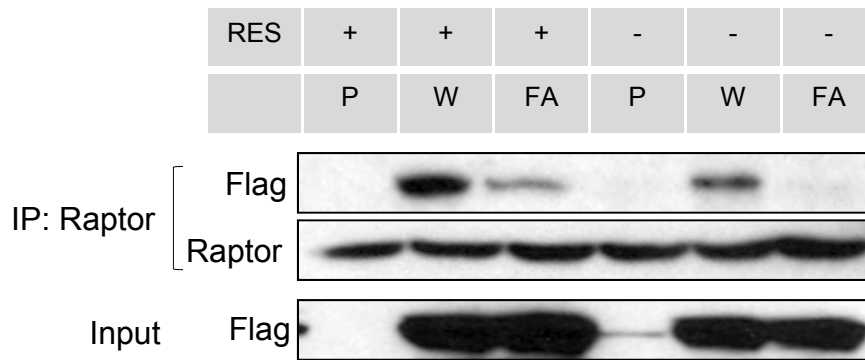

Fig. S3. F474A mutation reduces binding with Raptor. A431 cells transduced with Flag-tagged wild-type SIRT1 (W), Flag-tagged SIRT1 (F474A) mutant, or empty vector (P) were treated with RES for 24 h or not treated. The nuclear extracts were immunoprecipitated with anti-Raptor antibody, followed by Western blotting with anti-Flag antibody.
